# Supplementary material for: Identification and selective expansion of functionally superior T cells expressing chimeric antigen receptors
Source: PubMed Central journal article supplement (PMC4457995; doi:10.1186/s12967-015-0519-8), 2015-05-20

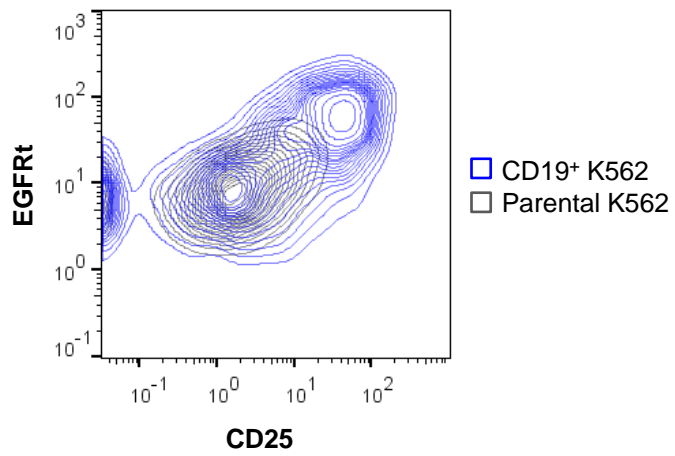

Supplement: 12967_2015_519_MOESM2_ESM.pdf [file 12967_2015_519_MOESM2_ESM.pdf]
