# Supplementary material for: Identification and selective expansion of functionally superior T cells expressing chimeric antigen receptors
Source: PubMed Central journal article supplement (PMC4457995; doi:10.1186/s12967-015-0519-8), 2015-05-20
Supplement: 12967_2015_519_MOESM6_ESM.pdf [file 12967_2015_519_MOESM6_ESM.pdf]

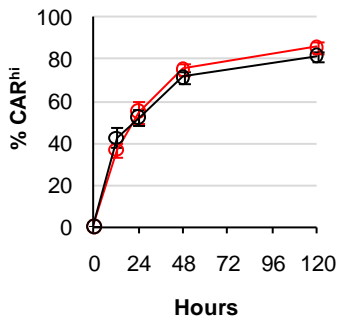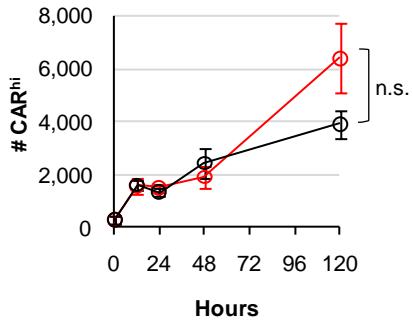

—○— CD19<sup>+</sup> K562 + anti-CD28

—○— CD19<sup>+</sup> K562
