# Supplementary material for: Identification and selective expansion of functionally superior T cells expressing chimeric antigen receptors
Source: PubMed Central journal article supplement (PMC4457995; doi:10.1186/s12967-015-0519-8), 2015-05-20
Supplement: 12967_2015_519_MOESM8_ESM.pdf [file 12967_2015_519_MOESM8_ESM.pdf]

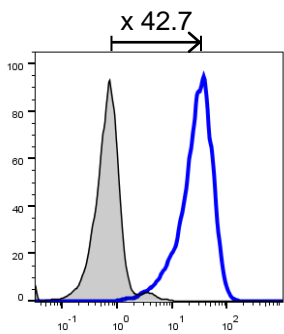

CD19+ H9

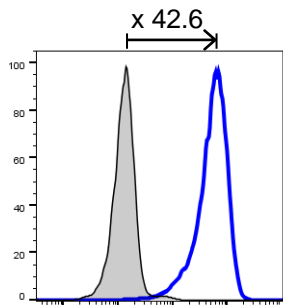

CD19+ K562

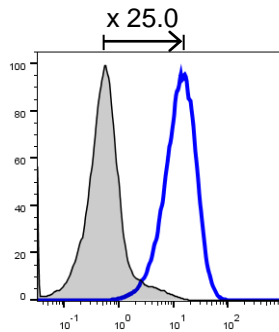

Raji

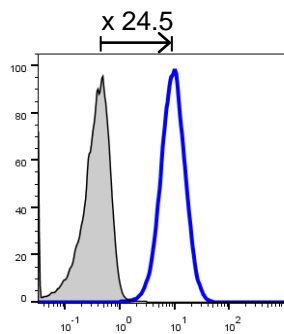

JeKo-1

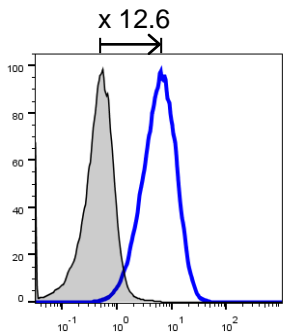

TM-LCL

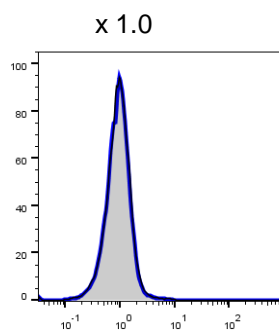

Parental K562

■ Anti-CD19 Staining  
■ Isotype Control
