# Supplementary material for: Identification and selective expansion of functionally superior T cells expressing chimeric antigen receptors
Source: PubMed Central journal article supplement (PMC4457995; doi:10.1186/s12967-015-0519-8), 2015-05-20

**A**CD8<sup>+</sup> T<sub>CM</sub>-Derived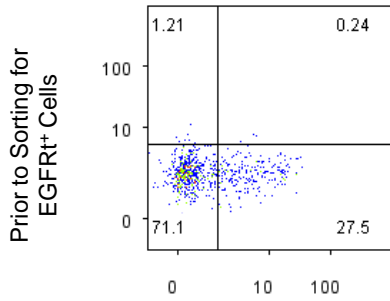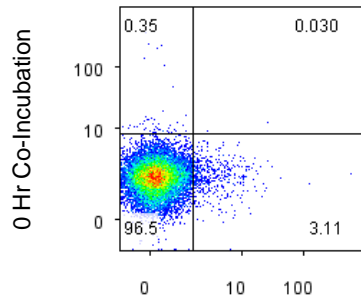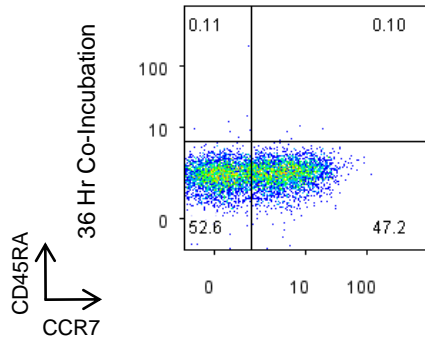**B**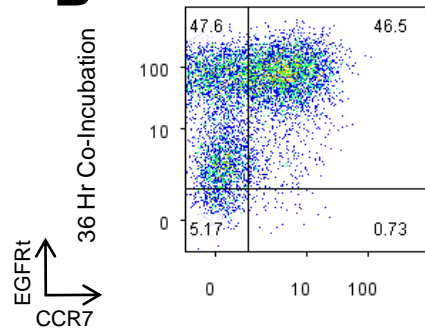**C**Bulk CD8<sup>+</sup>-Derived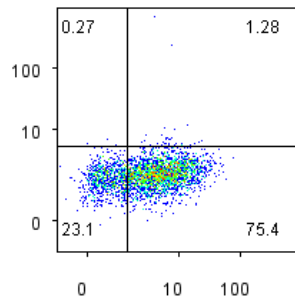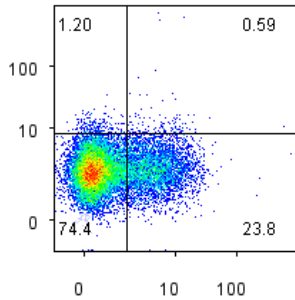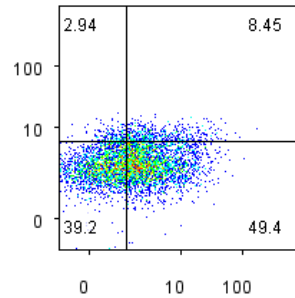**D**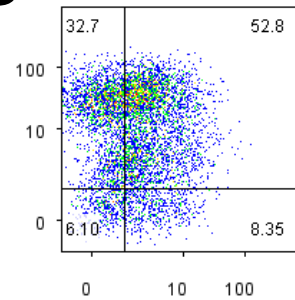

Supplement: 12967_2015_519_MOESM14_ESM.pdf [file 12967_2015_519_MOESM14_ESM.pdf]
